# Supplementary material for: Establishing a System for Testing Replication Inhibition of the Vibrio cholerae Secondary Chromosome in Escherichia coli
Source: PubMed Central journal article supplement (PMC5872114; doi:10.3390/antibiotics7010003), 2017-12-23

# Supplementary Materials: Establishing a System for Testing Replication Inhibition of the *Vibrio cholerae* Secondary Chromosome in *Escherichia coli*

Nadine Schallopp, Sarah Milbredt, Theodor Sperlea, Franziska S. Kemter, Matthias Bruhn, Daniel Schindler and Torsten Waldminghaus

Table S1. Strains used in this study.

| Strain             | Characteristics                                                                                                                                                                        | Resistance                   | Reference       |
|--------------------|----------------------------------------------------------------------------------------------------------------------------------------------------------------------------------------|------------------------------|-----------------|
| <i>E. coli</i>     |                                                                                                                                                                                        |                              |                 |
| MG1555             | wild type                                                                                                                                                                              | -                            | [1]             |
| AB330              | <i>cf.</i> DY330, <i>lacZ+</i> , <i>gal+</i>                                                                                                                                           | -                            | Alexander Böhm  |
| XL1 Blue           | <i>recA1 endA1 gyrA96 thi-1 hsdR17 supE44 relA1 lac[F' proAB lacIqZΔM15 Tn10 (TetR)]</i>                                                                                               | tetracycline, nalidixic acid | Stratagene      |
| DH5αpir            | F- Φ80 <i>lacZΔM15 Δ(lacZYA-argF)</i> U169 <i>recA1 endA1 hsdR17</i> (rK-, mK+) <i>phoA supE44 thi-1 gyrA96 relA1 λ+</i><br>Donor strain for conjugation: <i>thrB1004 pro thi rpsL</i> | nalidixic acid               | [2]             |
| WM3064             | <i>hsdS lacZΔM15 RP4-1360 Δ(araBAD)567 ΔdapA1341::[erm pir(wt)]</i>                                                                                                                    | erythromycin                 | William Metcalf |
| #1                 | MG1655 <i>oriC</i> (wt), <i>tos1</i>                                                                                                                                                   | -                            | [3]             |
| #15                | MG1655 <i>oriC</i> (wt), <i>oriV2</i> , <i>tos1</i>                                                                                                                                    | kanamycin                    | [3]             |
| #16                | MG1655 Δ <i>oriC</i> (wt), <i>oriV2</i> , <i>tos1</i>                                                                                                                                  | kanamycin                    | [3]             |
| SMS18              | MG1655 + pMA100                                                                                                                                                                        | ampicilin                    | [4]             |
| SMS29              | MG1655 + pMA106                                                                                                                                                                        | ampicilin                    | [4]             |
| FSK18              | MG1655 <i>parB</i> (1070231-1070357) <i>kanR</i>                                                                                                                                       | kanamycin                    | [4]             |
| SMS62              | MG1655 + pMA129                                                                                                                                                                        | ampicilin                    | [4]             |
| NZ90               | <i>cf.</i> #16; flipped KanR                                                                                                                                                           | -                            | this study      |
| SM112              | <i>cf.</i> #1; <i>lacZ::TetO/LacO-array-FRT</i> + pMA289                                                                                                                               | chloramphenicol              | [5]             |
| SM113              | <i>cf.</i> #16; <i>lacZ::TetO/LacO-array-FRT</i> + pMA289                                                                                                                              | chloramphenicol, kanamycin   | this study      |
| NZ127              | AB330 with <i>crtS</i> on chromosome                                                                                                                                                   | kanamycin                    | this study      |
| NZ133              | MG1655 with <i>crtS</i> on chromosome                                                                                                                                                  | kanamycin                    | this study      |
| NZ139              | MG1655 with <i>crtS</i> on chromosome, flipped KanR cassette                                                                                                                           | -                            | this study      |
| NZ134              | MG1655 Δ <i>oriC::oriII</i>                                                                                                                                                            | chloramphenicol              | this study      |
| NZ135              | AB330 Δ <i>oriC::oriII</i>                                                                                                                                                             | chloramphenicol              | this study      |
| NZ138              | MG1655 Δ <i>oriC::oriIII</i> , flipped CmR cassette                                                                                                                                    | -                            | this study      |
| NZ140              | NZ139 + pMA568                                                                                                                                                                         | ampicilin                    | this study      |
| NZ141              | NZ139 + pMA899                                                                                                                                                                         | ampicilin                    | this study      |
| NZ72               | MG1655 + pMA568                                                                                                                                                                        | ampicilin                    | this study      |
| NZ119              | MG1655 + pMA899                                                                                                                                                                        | ampicilin                    | this study      |
| SMS169             | WM3064 + pMA899                                                                                                                                                                        | erythromycin, ampicilin      | this study      |
| NZ122              | WM3064 + pMA206                                                                                                                                                                        | erythromycin, ampicilin      | this study      |
| SM141              | WM3064 + pMA308                                                                                                                                                                        | erythromycin, ampicilin      | this study      |
| NZ115              | WM3064 + pMA200                                                                                                                                                                        | erythromycin, ampicilin      | this study      |
| <i>V. cholerae</i> |                                                                                                                                                                                        |                              |                 |
| El Tor N16961      | wild type                                                                                                                                                                              | streptomycin                 | [6]             |
| MCH1               | fused chromosomes lacking <i>oriII</i>                                                                                                                                                 | streptomycin                 | [7]             |
| NSCV1              | natural isolate with fused chromosomes                                                                                                                                                 | -                            | [8]             |

Table S2. Plasmids used in this study.

| Plasmid   | Characteristics                                                                                                | Resistance                        | Reference  |
|-----------|----------------------------------------------------------------------------------------------------------------|-----------------------------------|------------|
| pCP20     | FLP <sup>+</sup> , $\lambda$ cI857 <sup>+</sup> , $\lambda$ p <sub>R</sub> Rep <sup>ts</sup>                   | ampicillin,<br>chloramphenicol    | [9]        |
| pICH50927 | Endlinker for MoClo reaction                                                                                   | ampicillin                        | [10]       |
| pICH50900 | Endlinker for MoClo reaction                                                                                   | ampicillin                        | [10]       |
| pMA87     | = synVicII-1.0                                                                                                 | ampicillin                        | [4]        |
| pMA90     | = synVicII-0.2                                                                                                 | ampicillin                        | [4]        |
| pMA100    | <i>oriII</i> -minichromosome (=synVicII-1.3)                                                                   | ampicillin                        | [4]        |
| pMA106    | <i>oriC</i> -minichromosome(=synEsc-1.3)                                                                       | ampicillin                        | [4]        |
| pMA108    | <i>oriII</i> minichromosome with scrambled DnaA box                                                            | ampicillin                        | this study |
| pMA109    | <i>oriII</i> minichromosome with inverted DnaA box                                                             | ampicillin                        | this study |
| pMA110    | <i>oriII</i> minichromosome with deleted DnaA box                                                              | ampicillin                        | this study |
| pMA111    | <i>oriII</i> minichromosome with R3 DnaA box                                                                   | ampicillin                        | this study |
| pMA112    | <i>oriII</i> minichromosome with R2 DnaA box                                                                   | ampicillin                        | this study |
| pMA113    | <i>oriII</i> minichromosome with deletion left of DnaA box                                                     | ampicillin                        | this study |
| pMA114    | <i>oriII</i> minichromosome with insertion right of DnaA box                                                   | ampicillin                        | this study |
| pMA115    | <i>oriII</i> minichromosome with insertion left of DnaA box                                                    | ampicillin                        | this study |
| pMA116    | <i>oriII</i> minichromosome with deletion right of DnaA box                                                    | ampicillin                        | this study |
| pMA129    | replicon with oriF (=synF-plasmid)                                                                             | ampicillin                        | [4]        |
| pMA132    | = synVicII-1.35                                                                                                | ampicillin                        | [11]       |
| pMA135    | =synVicII-1.351                                                                                                | ampicillin                        | [11]       |
| pMA157    | <i>crtS</i> for MoClo assembly                                                                                 | ampicillin                        | this study |
| pMA200    | pMA308 with <i>crtS</i>                                                                                        | ampicillin                        | this study |
| pMA206    | pMA899 with <i>crtS</i>                                                                                        | ampicillin                        | this study |
| pMA207    | <i>crtS</i> insertion into <i>fucR-rlmM</i> region on <i>E. coli</i> chromosome                                | spectinomycin,<br>kanamycin       | this study |
| pMA208    | <i>mmmG</i> flank for MoClo assembly                                                                           | ampicillin                        | this study |
| pMA209    | <i>mioC</i> flank for MoClo assembly                                                                           | ampicillin                        | this study |
| pMA210    | <i>oriII</i> insertion into <i>oriC</i> of <i>E. coli</i>                                                      | spectinomycin,<br>chloramphenicol | this study |
| pMA289    | pKG110 <i>tetR-mVenus</i>                                                                                      | chloramphenicol                   | [5]        |
| pMA308    | <i>oriC</i> -minichromosome with <i>oriT</i> for conjugation (longer region of <i>oriC</i> compared to pMA106) | ampicillin                        | this study |
| pMA327    | MoClo backbone vector for pMA207                                                                               | spectinomycin                     | [5]        |
| pMA329    | MoClo backbone vector for pMA210                                                                               | spectinomycin                     | [5]        |
| pMA349    | MoClo backbone vector for <i>crtS</i>                                                                          | ampicillin                        | [12]       |
| pMA350    | MoClo backbone vector for <i>mmmG</i> flank (for <i>oriC</i> to <i>oriII</i> exchange)                         | ampicillin                        | [12]       |
| pMA351    | MoClo backbone vector for <i>oriII</i> (for <i>oriC</i> to <i>oriII</i> exchange)                              | ampicillin                        | [12]       |
| pMA352    | MoClo backbone vector for CAT (for <i>oriC</i> to <i>oriII</i> exchange)                                       | ampicillin                        | [12]       |
| pMA353    | MoClo backbone vector for <i>mioC</i> flank (for <i>oriC</i> to <i>oriII</i> exchange)                         | ampicillin                        | [12]       |
| pMA431    | kanamycin cassette for MoClo assembly                                                                          | ampicillin,<br>kanamycin          | this study |
| pMA568    | <i>oriII</i> -minichromosome (with NotI-flanked <i>lacZ</i> )                                                  | ampicillin                        | this study |
| pMA650    | = synVicII-2.01                                                                                                | ampicillin                        | [11]       |
| pMA709    | <i>fucR-rlmM</i> 5' flank for MoClo assembly                                                                   | ampicillin                        | [5]        |
| pMA710    | <i>fucR-rlmM</i> 3' flank for MoClo assembly                                                                   | ampicillin                        | [5]        |
| pMA734    | chloramphenicol cassette for MoClo assembly                                                                    | ampicillin,<br>chloramphenicol    | this study |
| pMA740    | <i>oriII</i> for MoClo assembly                                                                                | ampicillin                        | this study |
| pMA899    | <i>oriF</i> -replicon with <i>oriT</i> for conjugation                                                         | ampicillin                        | this study |

Table S3. Oligonucleotides used in this study.

| Name      | Sequence (5' → 3')                                                                                                            |
|-----------|-------------------------------------------------------------------------------------------------------------------------------|
| 14        | CAATCTCAATTCGATCGGCCTGCACT                                                                                                    |
| 16        | GGTAGATCCGTATCACACTTACCGT                                                                                                     |
| 421       | GTACGAGAGGAAGGAGATACAACGACGCCTATCTTGATGTCATCCACTCAGGTGTAAAGT<br>TGACTGTGTGAGCACCTTG                                           |
| 422       | GTACGAGAGGAAGGAGATACAACGACGCCTATCTTGATGTCATCCACTCAGGTAATAGGT<br>TGACTGTGTGAGCACCTTG                                           |
| 423       | GTACGAGAGGAAGGAGATACAACGACGCCTATCTTGATGTCATCCACTCAGGTCTGTGTG<br>AGCACCTTGATC                                                  |
| 444       | GTACGAGAGGAAGGAGATACAACGACGCCTATCTTGATGTCATCCACTCAGGTTTTGGAT<br>AAACTGTGTGAGCACCTTGATCATGC                                    |
| 474       | GTACGAGAGGAAGGAGATACAACGACGCCTATCTTGATGTCATCCGGTTGTGGATAAACT<br>G                                                             |
| 475       | GTACGAGAGGAAGGAGATACAACGACGCCTATCTTGATGTCATCCGACTTACTCAGGTTG<br>TGG                                                           |
| 476       | GTACGAGAGGAAGGAGATACAACGACGCCTATCTTGATGTCATCCACTCAGGTTGTGGAT<br>AAATGAGCACCTTGATC                                             |
| 477       | GTACGAGAGGAAGGAGATACAACGACGCCTATCTTGATGTCATCCACTCAGGTTGTGGAT<br>AAAGACTTCTGTGTGAGCACCTTGATC                                   |
| 478       | GTACGAGAGGAAGGAGATACAACGACGCCTATCTTGATGTCATCCACTCAGGTTGTGTAT<br>AAACTGTGTGAGCACCTTGATCATGC                                    |
| 498       | GTACGAGAGGAAGGAGATACAACGACGCCTATCTTGATGTCATCCACTCAGGTTNNNNAT<br>AAACTGTGTGAGCACCTTG                                           |
| 703       | AAGGTCTCGGGAGGAAGTTCCTATACTTTCTAGAGAATAGGAACTTCGGAATAGGAACTT<br>CATTAAATGG                                                    |
| 704       | TGGTCTCCAGCGAAGTTCCTATTCTCTAGAAAGTATAGGAACTTCGGCGCGCCTACCTGT<br>GACCG                                                         |
| 1002      | TGGTGAGAATCCAAGTAGGGATAATTGCGGCCGAGCTGGCAGCAGGTTTGCCG                                                                         |
| 1004      | AACTTCGACAGCTATATTACCTGATGCGGCCGCGACTATGCGGCATCAGAGC                                                                          |
| 1204      | AAGGTCTCGGGAGCTAAAACGCACAAAGCCCG                                                                                              |
| 1205      | TGGTCTCCAGCGGTAGGCCAAAAAAGAGCGAGC                                                                                             |
| 1349      | GAACTTCTCGAGCATCTCCGACGGAAAGGTACCCGGTCCTTTGCTTGCCTTAGTATC<br>GAAAAATAAAACAAATAGGGTTCGCGGGAAAGAATTCTAATCCATACTTTCCACAGG<br>TAG |
| 1439      | AAGGTCTCGGGAGTGAGTGATCTTTTCACTATATTC                                                                                          |
| 1440      | TGGTCTCCAGCGCTCTTTTAAGCAGGATCCTAAC                                                                                            |
| 1455      | AAGGTCTCGGGAGGAAGTTCCTATACTTTCTAGAGAATAGGAACTTCGGAATAGGAACTT<br>CAAGATCCCC                                                    |
| 1456      | TGGTCTCCAGCGAGTTCCTATTCCGAAGTTCCTATTCTCTAGAAAGTATAGGAACTTCAG<br>AGCGCTTTTG                                                    |
| 1487      | GAGCATCTCCGACGGCGCGCCCATGGAGCGGCGTAACCGTC                                                                                     |
| 1488      | GGCCAGAGCTGCAGGCGCGCCCGTCGACAGCGACACACTTG                                                                                     |
| 1593      | TGGTGAGAATCCAAGTAGGGATAATGAGTGATCTTTTCACTATATTCTGTCTTAAGTCT                                                                   |
| 1613      | AACTTCGACAGCTATATTACCTGTTATCTCTTTTAAGCAGGATCCTAACCGGA                                                                         |
| 1661      | AAGGTCTCGGGAGGACCGCCGAGTGATCCACTTC                                                                                            |
| 1662      | TGGTCTCCAGCGCTTTTAAATACCCAGGATCC                                                                                              |
| 1663      | AAGGTCTCGGGAGATACTTATTTGAGTAAATTAAC                                                                                           |
| 1664      | TGGTCTCCAGCGCTGGCTGGTTATCAGCTCCAC                                                                                             |
| 3921366fw | GAGAATATGGCGTACCAGCA                                                                                                          |
| 3921366rv | AAGACGCAGGTATTTTCGCTT                                                                                                         |
| 3921366p  | CAACCTGACTTCGGTCCGCG 5'Fam-3'Tamra                                                                                            |
| ori2fw    | CCTTGAGCTTGAGATTGCTG                                                                                                          |
| ori2rv    | GCCGCCCTACTATCGTTAAA                                                                                                          |
| ori2probe | TGCTCACGCTGAGCCTCATTCA 5'Fam-3'Tamra                                                                                          |

**Table S4.** Oligonucleotides used for construction of mutated *oriII*-minichromosomes.

| Plasmid Name | Oligonucleotide Names |
|--------------|-----------------------|
| pMA108       | 421, 424              |
| pMA109       | 422, 424              |
| pMA110       | 423, 424              |
| pMA111       | 444, 424              |
| pMA112       | 478, 424              |
| pMA113       | 474, 424              |
| pMA114       | 477, 424              |
| pMA115       | 475, 424              |
| pMA116       | 476, 424              |

## References

1. Blattner, F.R.; et al. The complete genome sequence of *Escherichia coli* K-12. *Science* **1997**, *277*, 1453–1462.
2. Miller, V.L.; Mekalanos, J.J. A novel suicide vector and its use in construction of insertion mutations: Osmoregulation of outer membrane proteins and virulence determinants in *Vibrio cholerae* requires *toxR*. *J. Bacteriol.* **1988**, *170*, 2575–2583.
3. Liang, X.; Baek, C.H.; Katzen, F. *Escherichia coli* with two linear chromosomes. *ACS Synth. Biol.* **2013**, *2*, 734–740.
4. Messerschmidt, S.J.; et al. Synthetic secondary chromosomes in *Escherichia coli* based on the replication origin of chromosome II in *Vibrio cholerae*. *Biotechnol. J.* **2015**, *10*, 302–314.
5. Schindler, D.; et al. Design and Assembly of DNA Sequence Libraries for Chromosomal Insertion in Bacteria Based on a Set of Modified MoClo Vectors. *ACS Synth. Biol.* **2016**, *5*, 1362–1368.
6. Heidelberg, J.F.; et al. DNA sequence of both chromosomes of the cholera pathogen *Vibrio cholerae*. *Nature* **2000**, *406*, 477–483.
7. Val, M.E.; et al. Genome engineering in *Vibrio cholerae*: a feasible approach to address biological issues. *PLoS Genet.* **2012**, *8*, e1002472.
8. Xie, G.; et al. Exception to the Rule: Genomic Characterization of Naturally Occurring Unusual *Vibrio cholerae* Strains with a Single Chromosome. *Int. J. Genomics.* **2017**, doi:10.1155/2017/8724304.
9. Cherepanov, P.P.; Wackernagel, W. Gene disruption in *Escherichia coli*: TcR and KmR cassettes with the option of FLP-catalyzed excision of the antibiotic-resistance determinant. *Gene* **1995**, *158*, 9–14.
10. Weber, E.; et al. A modular cloning system for standardized assembly of multigene constructs. *PLoS One* **2011**, *6*, e16765.
11. Messerschmidt, S.J.; et al. Optimization and characterization of the synthetic secondary chromosome synVicII in *Escherichia coli*. *Front Bioeng. Biotechnol.* **2016**, *4*, 96.
12. Zumkeller, C.M.; Schindler, D.; Waldminghaus, T. Modular assembly of synthetic secondary chromosomes. *Methods Mol. Bio.* **2017** (accepted for publication).

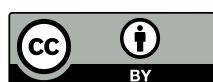

Supplement: antibiotics-07-00003-s001.pdf [file antibiotics-07-00003-s001.pdf]
